**Benefit-finding and self-compassion promote psychological well-being in caregivers of individuals with mental illness: a cross-sectional study**

Edina Yi-Qin Tan<sup>1\*</sup>, Vania T. Yip<sup>1</sup>, Kim Lian Rolles-Abraham<sup>2</sup>

<sup>1</sup>Division of Social Sciences, Yale-NUS College, 16 College Avenue West, Singapore 138527

<sup>2</sup>Better Life Psychological Medicine Clinic, 10 Sinaran Dr, #08-17/30, Singapore 307506

\*Address correspondence to:

Edina Yi-Qin Tan

Blk 450 Upper Changi Road #04-18 Palmwoods

Singapore 487040

Email: [edina.tan@u.yale-nus.edu.sg](mailto:edina.tan@u.yale-nus.edu.sg)

Phone: (+65) 9152 6694

1 **Abstract**

2 **Background:** Resilience factors that promote psychological well-being amongst caregivers of  
3 individuals with a mental illness are understudied. Coping strategies (problem-focused coping,  
4 emotion-focused coping and benefit-finding) have been found to influence the relation between  
5 stress and psychological outcomes, but their *relative* contribution to psychological well-being  
6 has not been tested. Self-compassion reduces caregiver burden in caregivers, yet no research has  
7 examined its contribution to psychological well-being nor the mechanisms via which it could do  
8 so. The aim of this study was to examine benefit-finding and self-compassion as resilience  
9 factors that could promote psychological well-being amongst caregivers of individuals with  
10 mental illnesses.

11 **Methods:** This cross-sectional study was conducted between June 2019 to October 2019 in  
12 Singapore. 107 informal caregivers of individuals with various diagnosed mental illnesses  
13 completed an online questionnaire. COPE, General Benefit Finding Scale (GBFS), Self-  
14 Compassion Scale - Short (SCS-SF), Psychological Well-Being Scale - Brief (PWBS-B), and  
15 Hospital Anxiety and Depression Scale (HADS) were used. Hierarchical multiple regression and  
16 mediation analyses were conducted.

17 **Results:** Benefit-finding was a more important predictor of psychological well-being compared  
18 to problem-focused and emotion-focused coping. Self-compassion was positively associated with  
19 psychological well-being amongst caregivers, and this is partially due to an increased use of  
20 problem-focused coping strategies.

21 **Conclusions:** Future interventions should cultivate caregivers' benefit-finding and self-  
22 compassion and consider using psychological well-being as an additional outcome measure.

## EXAMINING RESILIENCE FACTORS AMONGST CAREGIVERS

23 **Keywords:** Psychological well-being, Caregiving, Coping strategies, Benefit finding, Self-  
24 compassion

### 25 **Background**

26 Approximately 1 in 5 individuals suffer from a mental illness in their lifetime [1]. The  
27 debilitating course of mental illness, coupled with increasing deinstitutionalization, means that  
28 informal caregivers such as family members typically take on the responsibility of caring for  
29 such individuals [2]. Due to the stressful nature of caregiving, prior studies on informal  
30 caregivers have predominantly focused on examining the risk factors associated with higher  
31 levels of caregiver psychopathology [2–4]. However, the field of psychology is increasingly  
32 interested in positive mental health, which involves having psychological well-being *in addition*  
33 *to* lacking symptoms of psychopathology [5]. Longitudinal studies have shown that  
34 psychological well-being may be able to buffer individuals against physical and mental illness  
35 over time [6,7]. Such studies, alongside studies demonstrating that caregiving involves positive  
36 aspects (e.g., improved family cohesion, receipt of gratitude and appreciation from care  
37 recipients) that might contribute to the psychological well-being of the caregiver [8–10], suggest  
38 that there is value in enhancing caregivers' levels of psychological well-being. Hence, it is  
39 crucial to investigate the resilience factors that could sustain and boost psychological well-being  
40 amongst informal caregivers of individuals with mental illnesses.

### 41 **Coping Strategies**

42 The most common theoretical model used for studying how caregivers cope with the  
43 stress of caregiving is Lazarus and Folkman's stress-coping model [11,12]. According to the  
44 stress-coping model, how the caregiver appraises their stressors, as well as the coping strategies  
45 that they use to manage these stressors, plays a crucial role in determining the caregiver's

## EXAMINING RESILIENCE FACTORS AMONGST CAREGIVERS

46 psychological well-being [13]. The two most well-studied coping strategies are emotion-focused  
47 and problem-focused coping strategies, both of which have been conceptualised as part of the  
48 stress-coping model [11] (Fig. 1). Emotion-focused coping refer to processes that individuals  
49 engage in to try to reduce the emotional distress generated by the stressor, while problem-  
50 focused coping refer to processes that individuals engage in to try to directly alter the situation  
51 positively [14]. Whether or not emotion-focused coping and problem-focused coping are  
52 adaptive ways of coping with the stressor tends to be highly dependent on the characteristics and  
53 specific context of the stressor. Problem-focused coping tends to be more adaptive in situations  
54 where something can be done, while emotion-focused coping tends to be more adaptive in  
55 situations that have to be accepted [15]. In cases when the stressor is favorably resolved using  
56 either of these two coping strategies, positive emotions such as happiness and pride are generated  
57 [11] (Fig. 1), with positive emotions in turn associated with psychological well-being [16].

58         Considering mental illnesses are usually long-lasting with an unpredictable course [2],  
59 caring for an individual with a mental illness is typically a chronic stressor with no clear  
60 resolution [15]. This means that in the context of caregiving, traditionally well-studied adaptive  
61 coping strategies such as problem-focused coping and emotion-focused coping strategies may  
62 not be as effective in sustaining psychological well-being. This possibility is corroborated by  
63 inconsistent findings across studies which have examined the relations between problem-focused  
64 coping, emotion-focused coping, and caregiver psychological outcomes. Reliance on problem-  
65 focused coping has been associated with higher life satisfaction in prior caregiver studies [17],  
66 but may also lead caregivers to ignore the importance of taking time off from caregiving to focus  
67 on their own mental health [18]. Similarly, while some longitudinal studies have found that  
68 emotion-focused coping protects caregivers of individuals with mental illness from anxiety over

## EXAMINING RESILIENCE FACTORS AMONGST CAREGIVERS

69 time [19,20], others have found emotion-focused coping to be related to higher levels of  
70 depression in caregivers [21] — especially if the caregiver already had poor mental health and  
71 therefore decreased emotional regulation abilities [22].

72 In sum, problem-focused coping and emotion-focused coping may not adequately sustain  
73 psychological well-being in the context of caring for an individual with mental illness.

### 74 **Benefit-Finding**

75 To explain the coping processes underlying irresolvable stressors, the stress-coping  
76 model was later revised to introduce a new category of coping, known as meaning-focused  
77 coping [23]. Meaning-focused coping is a form of appraisal-based coping whereby a person  
78 draws on his or her beliefs, values, and existential goals to motivate and sustain coping [23,24].  
79 Coping by modifying one's core beliefs, values, and goals allows an individual to generate  
80 positive emotions [15]. These positive emotions in turn influence the stress process by restoring  
81 psychological and social resources [16], thereby allowing individuals to sustain other types of  
82 adaptive coping, such as problem-focused coping and emotion-focused coping [23] (Fig.1).

83 [Figure 1 about here.]

84 The most common conceptualization of meaning-focused coping is benefit-finding [15],  
85 a construct typically assessed across several dimensions — growth in wisdom, patience and  
86 competence; greater appreciation for life, greater clarity about what matters, strengthened faith or  
87 spirituality, and improved quality of social relationships [15]. Benefit-finding has consistently  
88 been found to be positively associated with psychological well-being. A meta-analysis found a  
89 moderately strong positive relationship between benefit-finding and psychological well-being  
90 amongst the general population [25]. In the general caregiving literature, there is evidence that  
91 child caregivers (ages 12 to 16) of individuals with a range of mental, physical and

## EXAMINING RESILIENCE FACTORS AMONGST CAREGIVERS

92 developmental disabilities do experience benefit-finding, with benefit-finding being directly  
93 predictive of their psychological well-being [26]. Moreover, caregivers of individuals with  
94 Alzheimer’s disease who were assigned to a benefit-finding intervention not only reported  
95 lowered depressive symptoms relative to participants in control groups (i.e., no benefit-finding  
96 intervention), but also had increased levels of psychological well-being [27].

97         Hence, benefit-finding may be more important for sustaining psychological well-being in  
98 caregivers of individuals with mental illnesses compared to the more traditionally studied  
99 adaptive coping strategies; problem-focused coping and emotion-focused coping. As such, we  
100 hypothesize that benefit-finding will be positively associated with psychological well-being  
101 (H1), and benefit-finding will predict psychological well-being over and above emotion-focused  
102 coping and problem-focused coping strategies (H2).

### 103 **Self-Compassion**

104         Compared to coping strategies, which are typically situation-dependent, a relatively more  
105 situation-independent resilience factor that could sustain psychological well-being in caregivers  
106 of individuals with mental illness is self-compassion. Self-compassion involves three  
107 components: (a) *self-kindness*, which involves being understanding towards oneself in the face of  
108 stress and failure, (b) *common humanity*, which involves viewing one’s suffering as part of a  
109 shared human experience wherein failures and imperfections are expected, and (c) *mindfulness*,  
110 which involves taking an open, accepting and nonjudgmental stance towards oneself and  
111 suffering [28].

112         Whether measured as a trait or a state, self-compassion has been found to relate  
113 positively to indicators of psychological well-being such as life satisfaction and subjective well-  
114 being, and relate negatively to anxiety and depression [29–31]. Importantly, self-compassion has

## EXAMINING RESILIENCE FACTORS AMONGST CAREGIVERS

115 been examined in the context of caregiving. Professional caregivers (i.e., nurses) who have high  
116 levels of self-compassion tend to provide more compassionate care and are more resistant to  
117 burnout compared to their less self-compassionate counterparts [32]. Informal caregivers follow  
118 a similar trend. Parents of children with Autism Spectrum Disorder who had higher levels of  
119 self-compassion experienced more life satisfaction and hope, and less stress and depressive  
120 symptoms [33]. Recently, [14] found that self-compassionate caregivers of individuals with  
121 dementia tended to experience lower levels of caregiver burden. Importantly, preliminary  
122 evidence suggests that self-compassion can be cultivated in caregivers. Caregivers of individuals  
123 with Alzheimer's disease who participated in a yoga and compassion meditation program as part  
124 of an intervention study exhibited significant improvements in their levels of self-compassion  
125 post-intervention [34].

### 126 **Self-Compassion and Coping**

127 A key mechanism via which self-compassion has been proposed to sustain psychological  
128 well-being during stressful times is by influencing persons' use of coping strategies [14,31]. For  
129 instance, when faced with stressful circumstances, individuals higher in self-compassion have  
130 been found to experience less anxiety compared to those lower in self-compassion even after  
131 accounting for self-esteem [35]. Hence, self-compassion can be considered part of the stress  
132 coping process. The associations between self-compassion and emotion-focused coping,  
133 problem-focused coping, as well as benefit finding are outlined below.

### 134 ***Self-Compassion and Emotion-Focused Coping***

135 A study that investigated this relationship found that self-compassionate students had a  
136 greater tendency to engage in emotion-focused coping strategies such as acceptance when  
137 encountering perceived academic failure [36], which led to greater positivity and resilience.

## EXAMINING RESILIENCE FACTORS AMONGST CAREGIVERS

### 138 *Self-Compassion and Problem-Focused Coping*

139           Self-compassion is positively associated with variables that predict problem-focused  
140 coping, such as optimism and personal initiative [35]. Hence, caregivers who are high in self-  
141 compassion may be more likely to engage directly with the source of their stress rather than be a  
142 passive observer; enabling them to take on greater responsibility in attaining their personal goals  
143 [31]. Meaningful goal pursuit, in turn, has been found to relate positively to positive life  
144 outcomes, including psychological well-being [37,38].

### 145 *Self-Compassion and Benefit-Finding*

146           Self-compassion has been found to relate strongly to positive cognitive restructuring,  
147 which involves altering one's view of a stressful situation to see it in a more positive manner  
148 [31]. Intervention studies have reported that positive cognitive restructuring helped participants  
149 view their stressors with greater self-directed compassion. Importantly, this increased self-  
150 compassion led to significant decreases in depression, anxiety and self-criticism amongst  
151 participants [35,39,40]. Given that benefit-finding involves a certain degree of positive cognitive  
152 restructuring [41], a possible pathway via which self-compassion may influence psychological  
153 well-being is by enhancing caregivers' use of benefit-finding to cope with the stressors of  
154 caregiving.

155           Despite encouraging evidence, no research has examined whether self-compassion could  
156 enhance psychological well-being amongst caregivers of individuals with mental illness, nor the  
157 specific mechanisms via which self-compassion could influence psychological well-being.  
158 Hence, we propose two further hypotheses: Self-compassion will be positively associated with  
159 psychological well-being (H3) and the type of coping strategy used (problem-focused coping,



## EXAMINING RESILIENCE FACTORS AMONGST CAREGIVERS

160 emotion-focused coping, and benefit-finding) will mediate the relationship between self-  
161 compassion and psychological well-being (H4).

### 162 **Methods**

#### 163 **Ethics statement**

164 Ethical approval for this study was obtained from the Institutional Review Board at the  
165 National University of Singapore.

#### 166 **Study design and sample**

167 The study sample consists of 107 caregivers who filled out an online survey between  
168 June 2019 and October 2019. Caregivers were recruited from two sites: a private clinic  
169 specialising in the treatment of eating disorders and a non-governmental organisation (NGO)  
170 dedicated to caregivers of individuals with mental illnesses<sup>1</sup>. For the private clinic, the  
171 recruitment process involved the distribution of flyers containing the link to the online survey to  
172 caregivers of persons attending the clinic. For the NGO, the recruitment process consisted of  
173 emails sent out to caregivers who had previously attended workshops held by the organisation.  
174 After providing informed consent, participants were told about the objectives of the study and  
175 subsequently completed an online survey. Upon study completion, participants were debriefed  
176 and received SGD \$5 as reimbursement.

#### 177 **Participant characteristics**

178 All study participants were at least 21 years of age, and were informal caregivers of  
179 individuals with mental illnesses such as psychotic disorder, anxiety disorder, mood disorder,  
180 eating disorders, obsessive compulsive disorder, post-traumatic stress disorder, and unknown  
181 mental illnesses (wherein the caregiver did not know the specific name of the illness). Care

---

<sup>1</sup> These two samples did not differ significantly on the constructs of interest (i.e., coping strategies, self-compassion, psychological well-being, psychopathology), and were therefore combined. All analyses that follow are based on this combined set of caregivers.

## EXAMINING RESILIENCE FACTORS AMONGST CAREGIVERS

182 recipient diagnoses were self-reported by the caregivers. To be eligible for the study, participants  
183 had to understand the English language, be the informal caretaker and/or relative of the person  
184 with mental illness and provide care and support to the individual with a mental illness. The  
185 informal caregiver was defined as an individual belonging to the care recipient's informal  
186 support system who provides care for, is at least partly responsible for the individual, and spends  
187 a substantial amount of time on caregiving without financial reimbursement [2]. Most caregivers  
188 were aged between 51-60 (37.4%), with a preponderance of females (69.2%), Chinese (72.0%),  
189 university level education (65.4%), and employed (66.4%). A majority of the caregivers were  
190 mothers to the CR (37.4%), resided in the same household as their CRs (73.8%), and had other  
191 caregivers present in the same household (78.5%). The caregivers' mean (SD) interaction hours  
192 (per week) with their CR was 33.1 (39.7). Most CRs were at least 20 years of age (82.7%), with  
193 a mean (SD) length of illness of 93.6 (135.1) months. The distribution of primary diagnoses  
194 amongst the CRs are as follows: mood disorder (35.5%), anxiety disorder (9.3%), psychotic  
195 disorder (23.4%), personality disorder (0.9%), eating disorder (22.4%), and other (8.4%).  
196 Participant characteristics are reported in Table 1.

[Table 1 about here.]

### 198 **Measures**

199 The questionnaire included the following instruments:

200 **Socio-demographic Variables.** Participants were asked for socio-demographic data such  
201 as age, gender, ethnicity, education level, employment status, income, living circumstances, age  
202 of care recipient (CR), CR diagnosis, length of CR illness, relationship to CR, and interaction  
203 hours with CR.

## EXAMINING RESILIENCE FACTORS AMONGST CAREGIVERS

204           **Problem-Focused and Emotion-Focused Coping Strategies.** The 60-item Coping  
205 Orientations to Problems Experienced Inventory (COPE; [42]) were used to assess caregivers'  
206 emotional-focused coping and problem-focused coping strategies. The COPE assesses 14  
207 different coping strategies. These strategies can be subsumed under 3 categories: emotion-  
208 focused coping (acceptance, emotional support, humor, positive reframing, and religion),  
209 problem-focused coping (active coping, instrumental support, and planning), and dysfunctional  
210 coping (behavioral disengagement, denial, self-distraction, self-blame, substance use and  
211 emotional venting) [14,43]. The present study focuses on only emotion-focused and problem-  
212 focused coping, therefore only items belonging to these two categories were included.  
213 Participants were asked: 'To what extent do the following statements describe how you cope  
214 with your present situation of caring for the individual with a mental illness?' Example items  
215 include 'I talk to someone to find out more about the situation' (problem-focused coping) and 'I  
216 accept that this has happened and that it can't be changed' (emotion-focused coping). Responses  
217 were recorded on a 4-point Likert-type scale where 1 = 'I haven't been doing this at all' and 4 =  
218 'I've been doing this a lot.' 'Positive reframing' items were not included in this study as positive  
219 reframing has been found to overlap statistically and conceptually with meaning-focused coping  
220 [17]. The rest of the items were summed to create an overall problem-focused coping and  
221 emotion-focused coping score. The COPE scale has been found to have good internal reliability,  
222 with an average Cronbach's Alpha of  $\alpha = .79$  across all subscales [42]. In the present study, the  
223 internal reliability was  $\alpha = .78$  for emotion-focused coping and  $\alpha = .89$  for problem-focused  
224 coping.

225           **Benefit-Finding.** The 28-item General Benefit Finding Scale (GBFS; [44]) was used to  
226 assess benefit-finding. The scale incorporates six different factors and has been previously used

## EXAMINING RESILIENCE FACTORS AMONGST CAREGIVERS

227 to ascertain levels of benefit-finding in relation to general life stress (i.e., stress that is not  
228 personal trauma or illness-related). Participants were asked: ‘To what extent do the following  
229 statements describe your experience of caring for the individual with a mental illness?’ Example  
230 items include ‘Led me to be more accepting of things’ and ‘Helped me become a stronger  
231 person’. Responses were recorded on a 5-point Likert-type scale where 1 = ‘Strongly Disagree’  
232 and 5 = ‘Strongly Agree’. All items were summed to create an overall benefit-finding score. The  
233 scale has been found to have good internal reliability, with Cronbach’s Alpha ranging from  $\alpha$   
234 = .76 to  $\alpha$  = .86 across the six factors [45]. In the present study, the internal reliability was as  
235 follows: acceptance ( $\alpha$  = .88), family bonds ( $\alpha$  = .87), personal growth ( $\alpha$  = .80), relationships ( $\alpha$   
236 = .87), empathy ( $\alpha$  = .88) and reprioritisation ( $\alpha$  = .79).

237       **Self-Compassion.** The 12-item Self-Compassion Scale - Short (SCS-SF; [46]) was used  
238 to assess self-compassion. Example items include ‘I try to see my failings as part of the human  
239 condition’ and ‘I’m disapproving and judgmental about my own flaws and inadequacies’.  
240 Responses were recorded on a 5-point Likert-type scale where 1 = ‘Almost Always’ and 5 =  
241 ‘Almost Never’. Negative items were reverse scored, and all items were summed to create an  
242 overall self-compassion score. The index has shown good internal consistency ( $\alpha$  = .86) and has  
243 an almost perfect correlation with the full scale ( $r$  = .98) [14,46]. In the present study, the internal  
244 reliability was  $\alpha$  = .75.

245       **Psychological Well-Being.** The 8-item Psychological Well-Being Scale - Brief (PWBS-  
246 B) was used to assess psychological well-being [47]. Example items include ‘I lead a purposeful  
247 and meaningful life’ and ‘I am engaged and interested in my daily activities.’ Responses were  
248 recorded on a 7-point Likert-type scale where 1 = ‘Strongly Disagree’ and 7 = ‘Strongly Agree’.  
249 All items were summed to create an overall psychological well-being score. The index has

## EXAMINING RESILIENCE FACTORS AMONGST CAREGIVERS

250 shown good internal consistency ( $\alpha = .86$ ) and showed strong correlations with the full scale ( $r =$   
251  $.80$ ). In the present study, the internal reliability was  $\alpha = .90$ .

252       **Psychopathology.** The 14-item Hospital Anxiety Depression Scale (HADS) was used to  
253 assess symptoms of psychopathology in the form of anxiety (7 items) and depressive states (7  
254 items) [48]. Example items included ‘I still enjoy the things I used to enjoy’ (depression) and ‘I  
255 feel tense or wound up’ (anxiety). Participants rate the frequency of feelings over the past week  
256 on a scale from 0 = ‘Not at All’ to 3 = ‘Very Often’. In this study, the total HADS score was  
257 used, as there is evidence for a single dimension of general psychopathology in the HADS  
258 [6,49]. Higher scores indicate more symptoms of psychopathology (range 0–42). In the present  
259 study, the internal reliability was  $\alpha = .90$ .

### 260 **Statistical Analysis**

261       All statistical analyses were conducted using SPSS Version 20 (IBM SPSS Statistics).  
262 Missing values and outlier analysis were performed<sup>2</sup>. Residual and scatter plots indicate the  
263 assumptions of normality, linearity and homoscedasticity were all satisfied. Linear regression  
264 was performed to investigate if benefit-finding and self-compassion were significant predictors  
265 of psychological well-being. Hierarchical multiple regression analysis was performed to  
266 investigate if benefit finding predicted psychological well-being over and above problem-  
267 focused coping and emotion-focused coping. Mediation analyses were performed to explore  
268 potential mediators of the relationship between self-compassion and psychological well-being.  
269 For all analyses, statistical significance was set at  $p < 0.05$  (two-tailed).

270

---

<sup>2</sup> On average, 1.87% of data was missing due to inconsistent reporting by participants. In total, 26% of participants ( $n = 28$ ) had one or more missing data points. Outlier analysis revealed potential outliers in PWBS-B ( $n = 2$ ), GBFS ( $n = 7$ ) and SCS-SF ( $n = 7$ ). As removing these outliers did not change the results of any analyses performed, only results with outliers included will be shown and discussed in the remainder of this article.

## EXAMINING RESILIENCE FACTORS AMONGST CAREGIVERS

### 271 *Power Analysis*

272           Apriori power analysis was conducted using *G\*Power 3.1* [50]. The power analysis  
273 indicated that a total sample of 103 participants will be needed to test medium effects (Cohen's  $f^2$   
274 = .15) with 80% power, using F-tests with alpha set at 0.05. Hence, the sample size of 107 in this  
275 study was deemed to have sufficient power to detect the effects of the resilience factors on  
276 psychological well-being.

### 277 **Results**

278           This sample of caregivers exhibited low levels of psychopathology (i.e., depression and  
279 anxiety) overall, with a mean (SD) HADS score of 14.06 (7.83). Only one caregiver met the  
280 HADS criteria for clinical anxiety (HADS cut-off score of 21 or higher).

### 281 **Benefit Finding**

282           A simple linear regression was carried out to investigate if benefit finding is a significant  
283 predictor of psychological well-being. Benefit finding was found to be a significant predictor of  
284 psychological well-being ( $F(8, 92) = 2.50, p = 0.017, \beta = .37, 95\% \text{ CI} [.10, .33]$ ), with an  $R^2$  of  
285 .18 (Cohen's  $f^2 = .22$ ) controlling for age, gender, ethnicity, education, income, CR diagnosis and  
286 relationship to CR. Previous caregiver studies have found these variables to covary with  
287 psychological well-being, and hence they were controlled for in the analyses (Trompetter et al.,  
288 2017; Lloyd et al, 2019). For this and all subsequent analyses conducted in this study, the same  
289 variables were controlled for.

290           A three-stage hierarchical multiple regression conducted with psychological well-being  
291 as the dependent variable revealed that problem-focused coping and emotion-focused coping  
292 (entered in step 2) accounted for 10.5% of the variation in psychological well-being, controlling  
293 for covariates (entered in step 1),  $\Delta F(2, 94) = 4.00, p = 0.021$ . Benefit-finding accounted for an

## EXAMINING RESILIENCE FACTORS AMONGST CAREGIVERS

294 additional 8.9% of variance in psychological well-being when it was added to the model (step 3),  
 295 with a significant change in  $R^2$  ( $\Delta F(1, 93) = 10.25, p = 0.002, \beta = .34, 95\% \text{ CI} [.08, .32]$ ). When  
 296 all the independent variables were included in the regression model, only benefit-finding  
 297 emerged as a significant predictor of psychological well-being. Hence, the most important  
 298 predictor of psychological well-being was benefit-finding, which uniquely explained 8.9% of the  
 299 variation in psychological well-being. Table 2 shows the results of the hierarchical multiple  
 300 regression.

301 **Table 2**  
 302 *Summary of hierarchical regression analysis*

| Variable               | $\beta$ | $t$    | R   | $R^2$ | $\Delta R^2$ |
|------------------------|---------|--------|-----|-------|--------------|
| <b>Step 1</b>          |         |        | .17 | .03   | -            |
| Age                    | 1.1     | 1.49   |     |       |              |
| Gender                 | -.10    | -.05   |     |       |              |
| Income                 | -.08    | -.16   |     |       |              |
| CR diagnosis           | .30     | .59    |     |       |              |
| <b>Step 2</b>          |         |        | .32 | .11   | .08          |
| Age                    | .89     | 1.24   |     |       |              |
| Gender                 | -.56    | -.29   |     |       |              |
| Income                 | -.01    | -.02   |     |       |              |
| CR diagnosis           | .27     | .54    |     |       |              |
| Problem-focused coping | .36     | 2.59*  |     |       |              |
| Emotion-focused coping | -.01    | -.06   |     |       |              |
| <b>Step 3</b>          |         |        | .44 | .19   | .08          |
| Age                    | .57     | .85    |     |       |              |
| Gender                 | -.57    | -.31   |     |       |              |
| Income                 | .14     | .29    |     |       |              |
| CR diagnosis           | .79     | 1.56   |     |       |              |
| Problem-focused coping | .24     | 1.93   |     |       |              |
| Emotion-focused coping | -.05    | -.42   |     |       |              |
| Benefit-finding        | .20     | 3.20** |     |       |              |

303 *Note. N = 107, \*p < .05, \*\*p < .01*

304

## EXAMINING RESILIENCE FACTORS AMONGST CAREGIVERS

### 305 **Self-Compassion**

306 A simple linear regression was carried out to investigate if self-compassion is a  
307 significant predictor of psychological well-being. Self-compassion was found to be a significant  
308 predictor of psychological well-being ( $F(8, 94) = 2.31, p = 0.026, \beta = .33, 95\% \text{ CI } [.23, .95]$ ),  
309 with an  $R^2$  of .16 (Cohen's  $f^2 = .20$ ).

### 310 **Mediation Analyses**

311 The fourth hypothesis predicted that coping strategies (emotion-focused coping, problem-  
312 focused coping, and benefit-finding) would be mediators of the relationship between self-  
313 compassion and psychological well-being. Problem-focused coping, emotion-focused coping,  
314 and benefit-finding were individually tested as the mediator across three separate models  
315 according to statistical and conceptual propositions for testing the presence of mediation [51].

316 Out of the three tested coping strategies, only problem-focused coping was significantly  
317 linked to self-compassion ( $B = .51, \beta = .36, p < 0.001, 95\% \text{ CI } [.25, .76]$ ). Therefore, further  
318 analyses were conducted only for problem-focused coping. Problem-focused coping was also  
319 significantly associated with psychological well-being, controlling for self-compassion ( $B = .27,$   
320  $\beta = .22, p = 0.028, 95\% \text{ CI } [.03, .51]$ ). For the above model including problem-focused coping  
321 as the mediator, the  $z$ -score was calculated to be 2.46 ( $95\% \text{ CI } [.08, .76]$ ). Hence, problem-  
322 focused coping was a statistically significant partial mediator of the relationship between self-  
323 compassion and psychological well-being (Fig. 2). The analyses used to test the hypothesized  
324 models are presented in Table 3. Only problem-focused coping is presented in Table 3 as only  
325 problem-focused coping met the criteria for further mediation analyses.

326 [Figure 2 about here.]

327

328



## EXAMINING RESILIENCE FACTORS AMONGST CAREGIVERS

329 **Table 3**

330 *Testing for problem-focused coping as a mediator using multiple regression*

| Steps in testing for mediation                                                                      | B   | SE B | 95% CI   | $\beta$ | R <sup>2</sup> |
|-----------------------------------------------------------------------------------------------------|-----|------|----------|---------|----------------|
| <i>Problem-focused coping</i>                                                                       |     |      |          |         |                |
| <b>Testing step 1 (path c)</b>                                                                      | .55 | .16  | .23, .88 | .31**   | .10            |
| Outcome: Psychological well-being<br>Predictor: Self-compassion                                     |     |      |          |         |                |
| <b>Testing step 2 (path a)</b>                                                                      | .51 | .13  | .25,.76  | .36**   | .13            |
| Outcome: Problem-focused coping<br>Predictor: Self-compassion                                       |     |      |          |         |                |
| <b>Testing step 3 (paths b and c')</b>                                                              | .27 | .12  | .03, .51 | .22*    | .12            |
| Outcome: Psychological well-being<br>Mediator: Problem-focused coping<br>Predictor: Self-compassion | .42 | .17  | .08, .76 | .24*    | .14            |

331 *Note. CI Confidence Interval; \*p < .05, \*\*p < .01*

331

### 332 **Discussion**

333 The present study aimed to examine benefit-finding and self-compassion as resilience  
 334 factors that could promote psychological well-being in caregivers of individuals with mental  
 335 illnesses. As predicted by the first hypothesis, benefit-finding was significantly associated with  
 336 caregiver psychological well-being. Caregivers who reported high levels of benefit-finding  
 337 experienced higher levels of psychological well-being than those lower in benefit-  
 338 finding. Moreover, in line with the second hypothesis, benefit-finding predicted psychological  
 339 well-being over and above the traditionally studied adaptive coping strategies, problem-focused  
 340 coping and emotion-focused coping. These results demonstrate that for caregivers of individuals  
 341 with mental illness, benefit-finding is a more important contributor to psychological well-being  
 342 than emotion-focused coping or problem-focused coping. The results of the present study are  
 343 consistent with, and add to, [23] revised stress coping model. Specifically, these results provide  
 344 the first empirical evidence for the previously untested theory that meaning-focused coping  
 345 strategies, such as benefit-finding, may play a relatively more crucial role in sustaining

## EXAMINING RESILIENCE FACTORS AMONGST CAREGIVERS

346 psychological well-being under circumstances where the stressor is chronic and unresolvable—  
347 such as caring for individuals with long-term mental illnesses.

348         The third hypothesis was also upheld, with self-compassion being positively associated  
349 with caregiver psychological well-being. The results are consistent with previous research, which  
350 found that self-compassion was negatively associated with *caregiver burden* among caregivers  
351 of individuals with dementia [14]. However, this study is the first to show that self-compassion  
352 and psychological well-being are positively associated in caregivers of individuals with a mental  
353 illness.

354         The fourth hypothesis, which predicted that the relationship between self-compassion and  
355 psychological well-being would be mediated by the use of adaptive coping strategies (emotion-  
356 focused coping, problem-focused coping and benefit-finding), was partly upheld. This study  
357 found that problem-focused coping partially mediates the relationship between self-compassion  
358 and psychological well-being. These results show that caregivers high in self-compassion have a  
359 greater tendency to utilise problem-focused coping strategies, which in turn at least partly leads  
360 to increased psychological well-being. This is consistent with previous studies, which found that  
361 self-compassionate caregivers are more likely to use adaptive coping strategies [14,52,53].

362         In this study, emotion-focused coping was not a significant mediator of the relationship  
363 between self-compassion and psychological well-being. This finding is consistent with and  
364 extends a previous study which found that emotion-focused coping does not appear to mediate  
365 the relationship between self-compassion and caregiver burden [14]. Emotion-focused coping  
366 strategies have been found to function differently compared to problem-focused coping and  
367 meaning-focused coping in the stress-coping model (Fig. 1). Specifically, emotion-focused  
368 coping tends to have complex, unpredictable interactions with caregiver outcomes and other

## EXAMINING RESILIENCE FACTORS AMONGST CAREGIVERS

369 caregiving factors. For instance, while some research has found that adopting emotion-focused  
370 coping strategies protect caregivers against anxiety [19], others have found no such relationship  
371 [14,54]. Hence, further research is warranted to elucidate the role of emotion-focused coping in  
372 relation to self-compassion and psychological well-being.

373 Surprisingly, benefit-finding was also not a significant mediator of the relationship  
374 between self-compassion and psychological well-being. This finding is unexpected, considering  
375 that (a) meaning-focused coping has been indirectly linked to self-compassion [31,41] and (b)  
376 greater reliance on meaning-focused coping has been associated with lower distress in prior  
377 caregiver studies [17]. However, it should be noted that the measures used in this study differ  
378 from measures used in previous caregivers studies. Prior studies tended to focus on caregiver  
379 distress, rather than psychological well-being as the outcome. However, the absence of caregiver  
380 distress is conceptually and functionally distinct from the presence of psychological well-being  
381 [55]. Hence, different mechanisms may underlie the relationship between benefit-finding, self-  
382 compassion and the outcome of psychological well-being, as compared to the outcome of  
383 caregiver distress. For instance, adopting benefit-finding coping strategies may lower caregivers'  
384 levels of psychological distress without necessarily increasing their levels of well-being [55].  
385 Future research should use consistent measures to better understand the mechanisms relating  
386 self-compassion, benefit-finding, and psychological well-being.

### 387 **Clinical Implications**

388 The finding that benefit-finding and self-compassion are positively associated with the  
389 psychological well-being of caregivers with mental illnesses highlights an important gap in  
390 current clinical care for caregivers. Beyond assessing symptoms of psychopathology amongst  
391 caregivers, this study shows that psychological well-being is also an effective measure of

## EXAMINING RESILIENCE FACTORS AMONGST CAREGIVERS

392 caregivers' quality of life and should be incorporated into current clinical assessments of  
393 caregivers to increase their ability to identify gaps in support. The significant relationships  
394 between the resilience factors, benefit-finding and self-compassion, to psychological well-being  
395 also highlight the importance of assessing these resilience factors. Specifically, low levels of  
396 benefit-finding and/or self-compassion could serve as reliable indicators of caregivers who are  
397 currently experiencing, or at risk of experiencing, low levels of psychological well-being.

398         Future intervention designs for caregivers could also benefit from the findings of this  
399 study. Although interventions promoting self-compassion and benefit-finding are gaining  
400 popularity and increasingly recognized as effective and accessible ways of supporting at-risk  
401 individuals [40,56], they tend to be designed with the goal of alleviating psychological distress  
402 rather than the goal of boosting psychological well-being. While alleviating psychological  
403 distress is an undoubtedly crucial goal, incorporating the goal of enhancing psychological well-  
404 being could go a long way in changing the mindsets of not only the caregivers, but also the  
405 clinicians and researchers involved. Specifically, interventions could incorporate content that  
406 encompass the multifaceted components of psychological well-being (e.g., positive social  
407 relationships, environmental mastery) and be held over a longer period of time, even after  
408 psychological distress has been measurably reduced. Moreover, scales that measure  
409 psychological well-being can be utilized alongside scales that measure psychological distress in  
410 order to add a further impact measure for the efficacy of current interventions.

411         The findings of this study should be viewed in light of its limitations. Firstly, analyses by  
412 subgroups of caregivers (e.g. by CR diagnoses) could not be conducted due to an insufficient  
413 sample size across sub-groups. Future studies can focus on at-risk subgroups of caregivers that  
414 have been identified as experiencing lower benefit-finding, self-compassion and/or psychological

## EXAMINING RESILIENCE FACTORS AMONGST CAREGIVERS

415 well-being. Secondly, the cross-sectional design of this study limits any ascertainment of  
416 causality. Future longitudinal studies could be run to provide stronger evidence for the causal  
417 relationship between benefit-finding, self-compassion and psychological well-being.

### 418 **Conclusions**

419 The aim of the present study was to explore the role of benefit-finding and self-  
420 compassion in promoting psychological well-being amongst caregivers of individuals with  
421 mental illnesses. The results of the study provide first empirical evidence that benefit-finding and  
422 self-compassion are crucial coping strategies that can promote caregivers' psychological well-  
423 being. However, more research is needed to explore whether and how the findings from this  
424 general study could apply to specific sub-groups of caregivers, as well as to explore the causal  
425 relations between benefit-finding, self-compassion, psychological well-being and  
426 psychopathology. Regardless, the present findings provide promising empirical evidence which  
427 can be used to develop interventions for caregivers that centre not only on reducing  
428 psychological distress, but also promoting psychological well-being. Such interventions could  
429 equip caregivers with the mental resilience necessary to shoulder their hefty caregiving  
430 responsibilities, while still living a flourishing life.

431

432

433

434

435

## EXAMINING RESILIENCE FACTORS AMONGST CAREGIVERS

**Table 1**

*Participant characteristics.*

| Socio-demographic variables   | N (%)     | Mean (SD) | Range |
|-------------------------------|-----------|-----------|-------|
| <i>Caregiver demographics</i> |           |           |       |
| <b>Age</b>                    |           |           |       |
| 21-30                         | 13 (12.1) |           |       |
| 31-40                         | 17 (15.9) |           |       |
| 41-50                         | 26 (24.3) |           |       |
| 51-60                         | 40 (37.4) |           |       |
| 61-70                         | 9 (8.4)   |           |       |
| 71-80                         | 2 (1.9)   |           |       |
| <b>Gender</b>                 |           |           |       |
| Male                          | 31 (29.5) |           |       |
| Female                        | 74 (69.2) |           |       |
| Missing                       | 2 (1.9)   |           |       |
| <b>Ethnicity</b>              |           |           |       |
| Chinese                       | 77 (72.0) |           |       |
| Malay                         | 3 (2.8)   |           |       |
| Indian                        | 7 (6.5)   |           |       |
| Caucasian                     | 9 (8.4)   |           |       |
| Others                        | 10 (9.3)  |           |       |
| Missing                       | 1 (0.9)   |           |       |
| <b>Educational level</b>      |           |           |       |
| Secondary and below           | 12 (11.2) |           |       |
| Postsecondary                 | 25 (23.4) |           |       |
| University and above          | 70 (65.4) |           |       |
| <b>Employment status</b>      |           |           |       |
| Employed                      | 71 (66.4) |           |       |
| Unemployed                    | 36 (33.6) |           |       |
| <b>Income (per annum)</b>     |           |           |       |
| <30k                          | 47 (43.9) |           |       |
| 30k – 50k                     | 1 (0.9)   |           |       |
| > 50k – 75k                   | 8 (7.5)   |           |       |
| >75k – 100k                   | 13 (12.1) |           |       |
| >100k                         | 36 (33.6) |           |       |
| Missing                       | 2 (1.9)   |           |       |
| <b>Relationship to CR</b>     |           |           |       |
| Mother                        | 40 (37.4) |           |       |
| Father                        | 11 (10.3) |           |       |

## EXAMINING RESILIENCE FACTORS AMONGST CAREGIVERS

|                               |                                       |           |              |       |
|-------------------------------|---------------------------------------|-----------|--------------|-------|
| 436                           | Spouse                                | 12 (11.2) |              |       |
|                               | Child                                 | 20 (18.7) |              |       |
| 437                           | Other (family or friend)              | 24 (22.4) |              |       |
| <hr/>                         |                                       |           |              |       |
| <i>Living Circumstances</i>   |                                       |           |              |       |
| <b>Co-resides with CR?</b>    |                                       |           |              |       |
| 438                           | Yes                                   | 79 (73.8) |              |       |
|                               | No                                    | 28 (26.2) |              |       |
| <b>Co-caregivers present?</b> |                                       |           |              |       |
| 439                           | Yes                                   | 84 (78.5) |              |       |
|                               | No                                    | 23 (21.5) |              |       |
| 440                           | <b>Interaction hours with CR/week</b> |           | 33.1 (39.7)  | 1-200 |
| <hr/>                         |                                       |           |              |       |
| <i>CR characteristics</i>     |                                       |           |              |       |
| <b>Age</b>                    |                                       |           |              |       |
| 441                           | 11-15                                 | 7 (6.5)   |              |       |
|                               | 16-20                                 | 17 (15.9) |              |       |
| 442                           | >20                                   | 82 (82.7) |              |       |
|                               | Missing                               | 1 (0.9)   |              |       |
|                               | <b>Length of illness (months)</b>     |           | 93.6 (135.1) | 0-854 |
| 443                           | <b>Primary diagnoses</b>              |           |              |       |
|                               | Mood disorder                         | 38 (35.5) |              |       |
|                               | Anxiety disorder                      | 10 (9.3)  |              |       |
| 444                           | Psychotic disorder                    | 25 (23.4) |              |       |
|                               | Personality disorder                  | 1 (0.9)   |              |       |
|                               | Eating disorder                       | 24 (22.4) |              |       |
| 445                           | Other                                 | 9 (8.4)   |              |       |

446

447

448

449

450

451

452

## EXAMINING RESILIENCE FACTORS AMONGST CAREGIVERS

### 453 **Declarations**

#### 454 **Ethics approval and consent to participate:**

455 Ethical approval was obtained from the Institutional Review Board at the National University of  
456 Singapore. All study participants provided informed consent prior to taking part in the study.

#### 457 **Consent for publication:**

458 Not applicable

#### 459 **Availability of data and materials:**

460 The datasets used and/or analysed during the current study are available from the corresponding  
461 author upon reasonable request.

#### 462 **Competing interests:**

463 The authors declare that they have no competing interests.

#### 464 **Funding:**

465 The research was funded by the Yale-NUS Capstone Fund.

#### 466 **Authors' contributions:**

467 EYQT, VTY and KLRA conceptualized the study. EYQT analyzed the data and wrote the  
468 manuscript. VTY was a major contributor in writing the manuscript. All authors read and  
469 approved the final manuscript.

#### 470 **Acknowledgements:**

471 Not applicable

472

473

474

475



## EXAMINING RESILIENCE FACTORS AMONGST CAREGIVERS

476

### References

- 477 1. Charlson F, van Ommeren M, Flaxman A, Cornett J, Whiteford H, Saxena S. New WHO  
478 prevalence estimates of mental disorders in conflict settings: a systematic review and meta-  
479 analysis. *Lancet* [Internet]. 2019;394:240–8. Available from: <http://dx.doi.org/10.1016/S0140->  
480 [6736\(19\)30934-1](http://dx.doi.org/10.1016/S0140-6736(19)30934-1)
- 481 2. Jeyagurunathan A, Sagayadevan V, Abdin E, Zhang Y, Chang S, Shafie S, et al. Psychological  
482 status and quality of life among primary caregivers of individuals with mental illness: a hospital  
483 based study. *Health Qual Life Outcomes* [Internet]. 2017;15:106. Available from:  
484 <http://dx.doi.org/10.1186/s12955-017-0676-y>
- 485 3. Oldridge ML, Hughes ICT. Psychological well-being in families with a member suffering  
486 from schizophrenia: An investigation into long-standing problems. *Br J Psychiatry* [Internet].  
487 Royal College of Psychiatrists; 1992;161:249–51. Available from:  
488 [https://www.cambridge.org/core/product/identifier/S0007125000139042/type/journal\\_article](https://www.cambridge.org/core/product/identifier/S0007125000139042/type/journal_article)
- 489 4. Dura JR, Stukenberg KW, Kiecolt-Glaser JK. Anxiety and depressive disorders in adult  
490 children caring for demented parents. *Psychol Aging* [Internet]. 1991;6:467–73. Available from:  
491 <http://dx.doi.org/10.1037//0882-7974.6.3.467>
- 492 5. Keyes CLM. Mental illness and/or mental health? Investigating axioms of the complete state  
493 model of health. *J Consult Clin Psychol* [Internet]. 2005;73:539–48. Available from:  
494 <http://dx.doi.org/10.1037/0022-006X.73.3.539>
- 495 6. Trompetter HR, de Kleine E, Bohlmeijer ET. Why Does Positive Mental Health Buffer  
496 Against Psychopathology? An Exploratory Study on Self-Compassion as a Resilience  
497 Mechanism and Adaptive Emotion Regulation Strategy [Internet]. *Cognitive Therapy and*  
498 *Research*. 2017. p. 459–68. Available from: <http://dx.doi.org/10.1007/s10608-016-9774-0>
- 499 7. Keyes CLM, Dhingra SS, Simoes EJ. Change in level of positive mental health as a predictor  
500 of future risk of mental illness. *Am J Public Health* [Internet]. 2010;100:2366–71. Available  
501 from: <http://dx.doi.org/10.2105/AJPH.2010.192245>
- 502 8. Cohen CA, Colantonio A, Vernich L. Positive aspects of caregiving: rounding out the  
503 caregiver experience. *Int J Geriatr Psychiatry* [Internet]. 2002;17:184–8. Available from:  
504 <http://dx.doi.org/10.1002/gps.561>
- 505 9. Lawton MP, Moss M, Kleban MH, Glicksman A, Rovine M. A two-factor model of  
506 caregiving appraisal and psychological well-being. *J Gerontol* [Internet]. 1991;46:P181–9.  
507 Available from: <http://dx.doi.org/10.1093/geronj/46.4.p181>
- 508 10. Pinquart M, Sörensen S. Associations of caregiver stressors and uplifts with subjective well-  
509 being and depressive mood: a meta-analytic comparison. *Aging Ment Health* [Internet].  
510 2004;8:438–49. Available from: <http://dx.doi.org/10.1080/13607860410001725036>
- 511 11. Lazarus RS, Folkman S. *Stress, Appraisal, and Coping* [Internet]. Springer Publishing  
512 Company; 1984. Available from: <https://play.google.com/store/books/details?id=i-ySQQuUpr8C>

## EXAMINING RESILIENCE FACTORS AMONGST CAREGIVERS

- 513 12. Folkman S. Dynamics of a stressful encounter: Cognitive appraisal, coping, and encounter  
514 outcomes [Internet]. *Journal of Personality and Social Psychology*. 1986. p. 992–1003. Available  
515 from: <http://dx.doi.org/10.1037//0022-3514.50.5.992>
- 516 13. Szmukler GI, Burgess P, Herrman H, Benson A, Colusa S, Bloch S. Caring for relatives with  
517 serious mental illness: the development of the Experience of Caregiving Inventory. *Soc*  
518 *Psychiatry Psychiatr Epidemiol* [Internet]. 1996;31:137–48. Available from:  
519 <http://dx.doi.org/10.1007/BF00785760>
- 520 14. Lloyd J, Muers J, Patterson TG, Marczak M. Self-Compassion, Coping Strategies, and  
521 Caregiver Burden in Caregivers of People with Dementia. *Clin Gerontol* [Internet]. 2019;42:47–  
522 59. Available from: <http://dx.doi.org/10.1080/07317115.2018.1461162>
- 523 15. Folkman S. The case for positive emotions in the stress process. *Anxiety Stress Coping*  
524 [Internet]. 2008;21:3–14. Available from: <http://dx.doi.org/10.1080/10615800701740457>
- 525 16. Fredrickson BL. The role of positive emotions in positive psychology. The broaden-and-  
526 build theory of positive emotions. *Am Psychol* [Internet]. 2001;56:218–26. Available from:  
527 <http://dx.doi.org/10.1037//0003-066x.56.3.218>
- 528 17. Mackay C, Pakenham KI. Identification of stress and coping risk and protective factors  
529 associated with changes in adjustment to caring for an adult with mental illness. *J Clin Psychol*  
530 [Internet]. 2011;67:1064–79. Available from: <http://dx.doi.org/10.1002/jclp.20829>
- 531 18. Treasure J, Whitaker W, Whitney J, Schmidt U. Working with families of adults with  
532 anorexia nervosa [Internet]. *Journal of Family Therapy*. 2005. p. 158–70. Available from:  
533 <http://dx.doi.org/10.1111/j.1467-6427.2005.00308.x>
- 534 19. Cooper C, Katona C, Orrell M, Livingston G. Coping strategies, anxiety and depression in  
535 caregivers of people with Alzheimer’s disease. *Int J Geriatr Psychiatry* [Internet]. 2008;23:929–  
536 36. Available from: <http://dx.doi.org/10.1002/gps.2007>
- 537 20. Vitaliano PP, Russo J, Young HM, Teri L, Maiuro RD. Predictors of burden in spouse  
538 caregivers of individuals with Alzheimer’s disease. *Psychol Aging* [Internet]. American  
539 Psychological Association (APA); 1991;6:392–402. Available from:  
540 <http://doi.apa.org/getdoi.cfm?doi=10.1037/0882-7974.6.3.392>
- 541 21. Kim HW, Greenberg JS, Seltzer MM, Krauss MW. The role of coping in maintaining the  
542 psychological well-being of mothers of adults with intellectual disability and mental illness. *J*  
543 *Intellect Disabil Res* [Internet]. 2003;47:313–27. Available from:  
544 <http://dx.doi.org/10.1046/j.1365-2788.2003.00493.x>
- 545 22. Aldwin CM, Revenson TA. Does coping help? A reexamination of the relation between  
546 coping and mental health. *J Pers Soc Psychol* [Internet]. American Psychological Association  
547 (APA); 1987;53:337–48. Available from: <http://doi.apa.org/getdoi.cfm?doi=10.1037/0022-3514.53.2.337>
- 549 23. Park CL, Folkman S. Meaning in the context of stress and coping [Internet]. Review of

## EXAMINING RESILIENCE FACTORS AMONGST CAREGIVERS

- 550 General Psychology. 1997. p. 115–44. Available from: <http://dx.doi.org/10.1037//1089->  
551 2680.1.2.115
- 552 24. Aldwin CM. Stress, Coping, and Development: An Integrative Perspective [Internet].  
553 Guilford Press; 2007. Available from: <https://play.google.com/store/books/details?id=u->  
554 \_wag7hW3oC
- 555 25. Helgeson VS, Reynolds KA, Tomich PL. A meta-analytic review of benefit finding and  
556 growth [Internet]. Journal of Consulting and Clinical Psychology. 2006. p. 797–816. Available  
557 from: <http://dx.doi.org/10.1037/0022-006x.74.5.797>
- 558 26. Cassidy T, Giles M, McLaughlin M. Benefit finding and resilience in child caregivers  
559 [Internet]. British Journal of Health Psychology. 2014. p. 606–18. Available from:  
560 <http://dx.doi.org/10.1111/bjhp.12059>
- 561 27. Cheng S-T, Mak EPM, Fung HH, Kwok T, Lee DTF, Lam LCW. Benefit-finding and effect  
562 on caregiver depression: A double-blind randomized controlled trial. J Consult Clin Psychol  
563 [Internet]. 2017;85:521–9. Available from: <http://dx.doi.org/10.1037/ccp0000176>
- 564 28. Neff KD. The Development and Validation of a Scale to Measure Self-Compassion  
565 [Internet]. Self and Identity. 2003. p. 223–50. Available from:  
566 <http://dx.doi.org/10.1080/15298860309027>
- 567 29. Neely ME, Schallert DL, Mohammed SS, Roberts RM, Chen Y-J. Self-kindness when facing  
568 stress: The role of self-compassion, goal regulation, and support in college students' well-being  
569 [Internet]. Motivation and Emotion. 2009. p. 88–97. Available from:  
570 <http://dx.doi.org/10.1007/s11031-008-9119-8>
- 571 30. Neff KD. Self-compassion and psychological well-being [Internet]. PsycEXTRA Dataset.  
572 2005. Available from: <http://dx.doi.org/10.1037/e633942013-240>
- 573 31. Allen AB, Leary MR. Self-Compassion, Stress, and Coping [Internet]. Social and Personality  
574 Psychology Compass. 2010. p. 107–18. Available from: <http://dx.doi.org/10.1111/j.1751->  
575 9004.2009.00246.x
- 576 32. Beaumont E, Durkin M, Hollins Martin CJ, Carson J. Compassion for others, self-  
577 compassion, quality of life and mental well-being measures and their association with  
578 compassion fatigue and burnout in student midwives: A quantitative survey [Internet].  
579 Midwifery. 2016. p. 239–44. Available from: <http://dx.doi.org/10.1016/j.midw.2015.11.002>
- 580 33. Neff KD, Faso DJ. Self-Compassion and Well-Being in Parents of Children with Autism  
581 [Internet]. Mindfulness. 2015. p. 938–47. Available from: <http://dx.doi.org/10.1007/s12671-014->  
582 0359-2
- 583 34. Danucalov MAD, Kozasa EH, Afonso RF, Galduroz JCF, Leite JR. Yoga and compassion  
584 meditation program improve quality of life and self-compassion in family caregivers of  
585 Alzheimer's disease patients: A randomized controlled trial [Internet]. Geriatrics & Gerontology  
586 International. 2017. p. 85–91. Available from: <http://dx.doi.org/10.1111/ggi.12675>

## EXAMINING RESILIENCE FACTORS AMONGST CAREGIVERS

- 587 35. Neff KD, Kirkpatrick KL, Rude SS. Self-compassion and adaptive psychological functioning  
588 [Internet]. *Journal of Research in Personality*. 2007. p. 139–54. Available from:  
589 <http://dx.doi.org/10.1016/j.jrp.2006.03.004>
- 590 36. Neff KD, Hsieh Y-P, Dejjitterat K. Self-compassion, Achievement Goals, and Coping with  
591 Academic Failure. *Self Identity* [Internet]. Routledge; 2005;4:263–87. Available from:  
592 <https://doi.org/10.1080/13576500444000317>
- 593 37. Diener E, Suh EM, Lucas RE, Smith HL. Subjective well-being: Three decades of progress.  
594 *Psychol Bull* [Internet]. 1999;125:276–302. Available from:  
595 <https://psycnet.apa.org/fulltext/1999-10106-007.pdf>
- 596 38. Koestner R, Lekes N, Powers TA, Chicoine E. Attaining personal goals: self-concordance  
597 plus implementation intentions equals success. *J Pers Soc Psychol* [Internet]. 2002;83:231–44.  
598 Available from: <https://www.ncbi.nlm.nih.gov/pubmed/12088128>
- 599 39. Leary MR, Tate EB, Adams CE, Allen AB, Hancock J. Self-compassion and reactions to  
600 unpleasant self-relevant events: the implications of treating oneself kindly. *J Pers Soc Psychol*  
601 [Internet]. 2007;92:887–904. Available from: <http://dx.doi.org/10.1037/0022-3514.92.5.887>
- 602 40. Gilbert P, Procter S. Compassionate mind training for people with high shame and self-  
603 criticism: overview and pilot study of a group therapy approach. *Clin Psychol Psychother*  
604 [Internet]. Wiley; 2006;13:353–79. Available from: <http://doi.wiley.com/10.1002/cpp.507>
- 605 41. Pascoe EC, Edvardsson D. Which coping strategies can predict beneficial feelings associated  
606 with prostate cancer? *J Clin Nurs* [Internet]. 2016;25:2569–78. Available from:  
607 <http://dx.doi.org/10.1111/jocn.13300>
- 608 42. Carver CS, Scheier MF, Weintraub JK. Assessing coping strategies: a theoretically based  
609 approach. *J Pers Soc Psychol* [Internet]. 1989;56:267–83. Available from:  
610 <http://dx.doi.org/10.1037//0022-3514.56.2.267>
- 611 43. Coolidge FL, Segal DL, Hook JN, Stewart S. Personality disorders and coping among  
612 anxious older adults. *J Anxiety Disord* [Internet]. 2000;14:157–72. Available from:  
613 [http://dx.doi.org/10.1016/s0887-6185\(99\)00046-8](http://dx.doi.org/10.1016/s0887-6185(99)00046-8)
- 614 44. Cassidy T, McLaughlin M, Giles M. Benefit finding in response to general life stress:  
615 measurement and correlates. *Health Psychol Behav Med* [Internet]. 2014;2:268–82. Available  
616 from: <http://dx.doi.org/10.1080/21642850.2014.889570>
- 617 45. Cassidy T, Doyle I. Benefit finding and well-being in older adults: The utility of the General  
618 Benefit Finding Scale. *Int J Psychol Res (Medellin)* [Internet]. 2018;11:8–18. Available from:  
619 <http://dx.doi.org/10.21500/20112084.3382>
- 620 46. Raes F, Pommier E, Neff KD, Van Gucht D. Construction and factorial validation of a short  
621 form of the Self-Compassion Scale. *Clin Psychol Psychother* [Internet]. 2011;18:250–5.  
622 Available from: <http://dx.doi.org/10.1002/cpp.702>

## EXAMINING RESILIENCE FACTORS AMONGST CAREGIVERS

- 623 47. Diener E. *Assessing Well-Being: The Collected Works of Ed Diener* [Internet]. Springer  
624 Netherlands; 2009. Available from:  
625 <https://play.google.com/store/books/details?id=Nb39uAEACAAJ>
- 626 48. Zigmond AS, Snaith RP. The hospital anxiety and depression scale. *Acta Psychiatr Scand*  
627 [Internet]. 1983;67:361–70. Available from: [http://dx.doi.org/10.1111/j.1600-](http://dx.doi.org/10.1111/j.1600-0447.1983.tb09716.x)  
628 [0447.1983.tb09716.x](http://dx.doi.org/10.1111/j.1600-0447.1983.tb09716.x)
- 629 49. Spinhoven P, Ormel J, Sloekers PP, Kempen GI, Speckens AE, Van Hemert AM. A  
630 validation study of the Hospital Anxiety and Depression Scale (HADS) in different groups of  
631 Dutch subjects. *Psychol Med* [Internet]. 1997;27:363–70. Available from:  
632 <http://dx.doi.org/10.1017/s0033291796004382>
- 633 50. Faul F, Erdfelder E, Buchner A, Lang A-G. Statistical power analyses using G\*Power 3.1:  
634 Tests for correlation and regression analyses [Internet]. *Behavior Research Methods*. 2009. p.  
635 1149–60. Available from: <http://dx.doi.org/10.3758/brm.41.4.1149>
- 636 51. Baron RM, Kenny DA. The moderator–mediator variable distinction in social psychological  
637 research: Conceptual, strategic, and statistical considerations. *J Pers Soc Psychol* [Internet].  
638 1986;51:1173–82. Available from: <https://psycnet.apa.org/fulltext/1987-13085-001.pdf>
- 639 52. Murfield J, Moyle W, O’Donovan A, Ware RS. The Role of Self-Compassion, Dispositional  
640 Mindfulness, and Emotion Regulation in the Psychological Health of Family Carers of Older  
641 Adults. *Clin Gerontol* [Internet]. 2020;1–13. Available from:  
642 <http://dx.doi.org/10.1080/07317115.2020.1846650>
- 643 53. Wong CCY, Mak WWS, Liao KY-H. Self-Compassion: a Potential Buffer Against Affiliate  
644 Stigma Experienced by Parents of Children with Autism Spectrum Disorders. *Mindfulness*  
645 [Internet]. 2016;7:1385–95. Available from: <https://doi.org/10.1007/s12671-016-0580-2>
- 646 54. Mak WWS, Ho GSM. Caregiving perceptions of Chinese mothers of children with  
647 intellectual disability in Hong Kong. *J Appl Res Intellect Disabil* [Internet]. Wiley; 2007;20:145–  
648 56. Available from: <http://doi.wiley.com/10.1111/j.1468-3148.2006.00309.x>
- 649 55. Huppert FA, Whittington JE. Evidence for the independence of positive and negative well-  
650 being: implications for quality of life assessment. *Br J Health Psychol* [Internet]. 2003;8:107–22.  
651 Available from: <http://dx.doi.org/10.1348/135910703762879246>
- 652 56. Cheng S-T, Lau RWL, Mak EPM, Ng NSS, Lam LCW, Fung HH, et al. A benefit-finding  
653 intervention for family caregivers of persons with Alzheimer disease: study protocol of a  
654 randomized controlled trial. *Trials* [Internet]. 2012;13:98. Available from:  
655 <http://dx.doi.org/10.1186/1745-6215-13-98>

## Figures

**Figure 1**

*Simplified stress-coping model (Park & Folkman, 1997)*

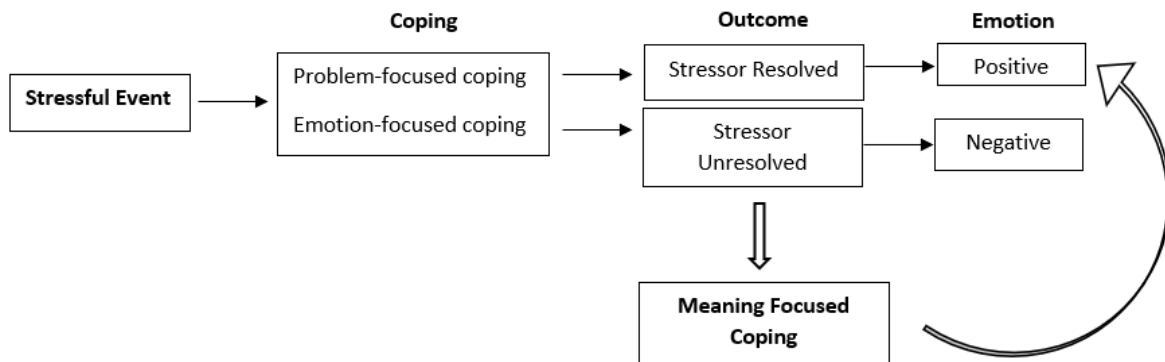

*Note.* Meaning-focused coping has been hypothesized to generate positive emotions in situations where the stressor remains unresolved.

## Figure 2

### Testing for problem-focused coping as a mediator

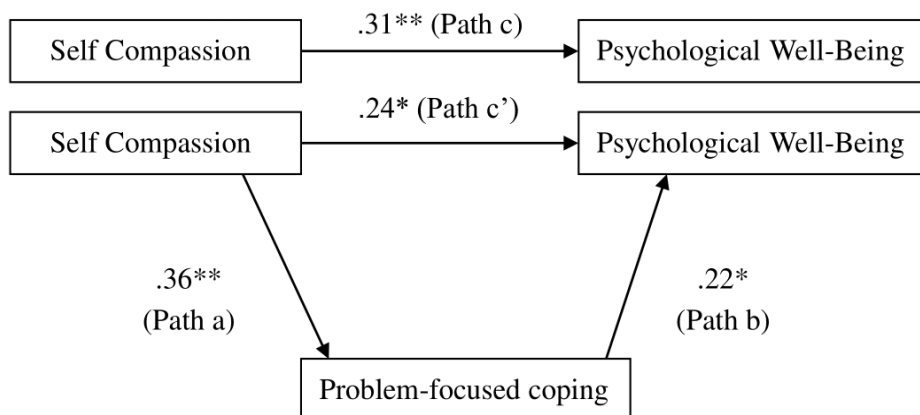

*Note.* Standardized regression coefficients for the relationship between self-compassion and psychological well-being as mediated by problem-focused coping.

\* $p < .05$ , \*\* $p < .01$
